# Supplementary material for: Effects of composition and nanostructuring of palladium selenide phases, Pd4Se, Pd7Se4and Pd17Se15, on ORR activity and their use in Mg–air batteries
Source: Royal Society of Chemistry journal article supplement (doi:10.1039/c7ta00253j), 2017-01-01
Supplement: c7ta00253j1.pdf [file c7ta00253j1.pdf]

## Supporting information

Effect of Composition and Nanostructuring of Palladium Selenides, Pd<sub>4</sub>Se, Pd<sub>7</sub>Se<sub>4</sub> and Pd<sub>17</sub>Se<sub>15</sub> on Oxygen Reduction Activity and Their use in Mg-Air Batteries

Suresh Kukunuri, Keerti Naik, S. Sampath\*

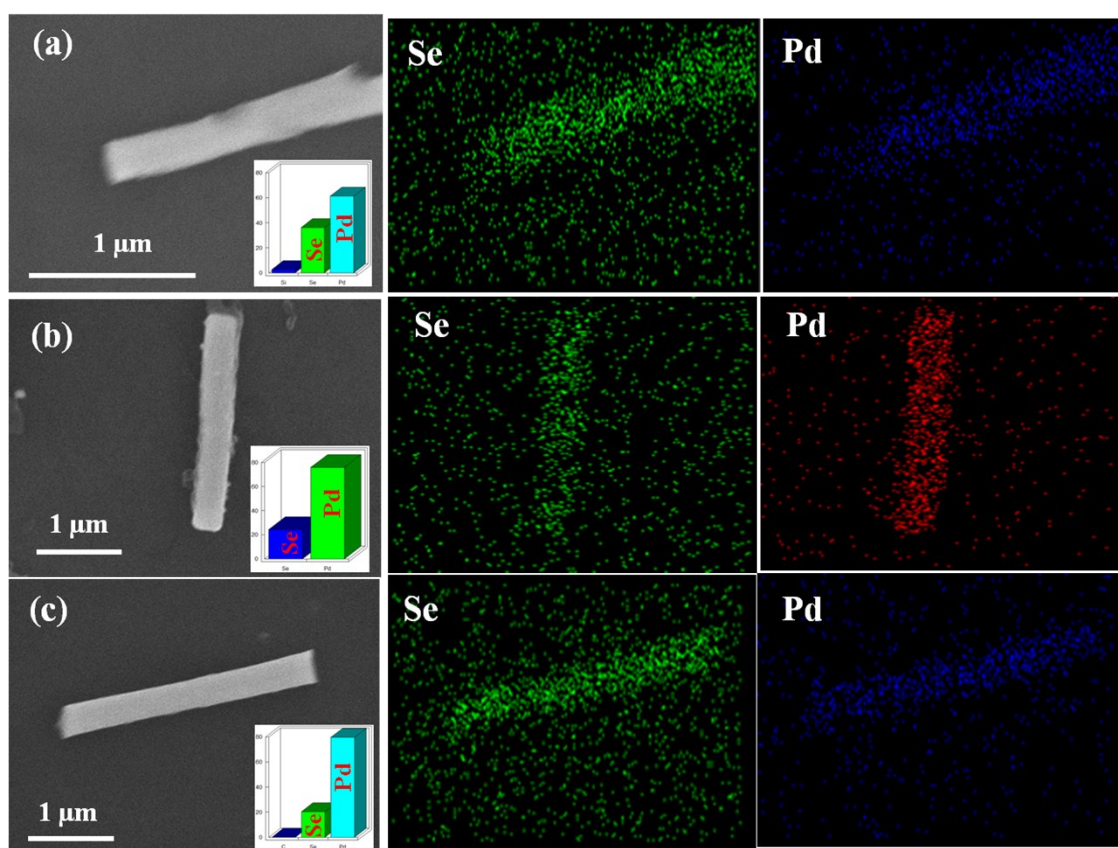

**Figure S1.** SEM images and corresponding elemental mapping of (a) Pd<sub>17</sub>Se<sub>15</sub>, (b) Pd<sub>7</sub>Se<sub>4</sub> and (c) Pd<sub>4</sub>Se [mapping images indicates the presence of Se and Pd in all the three nanostructures and inset in a, b and c indicates the respective weight percentages of Pd and Se from EDAX analysis].

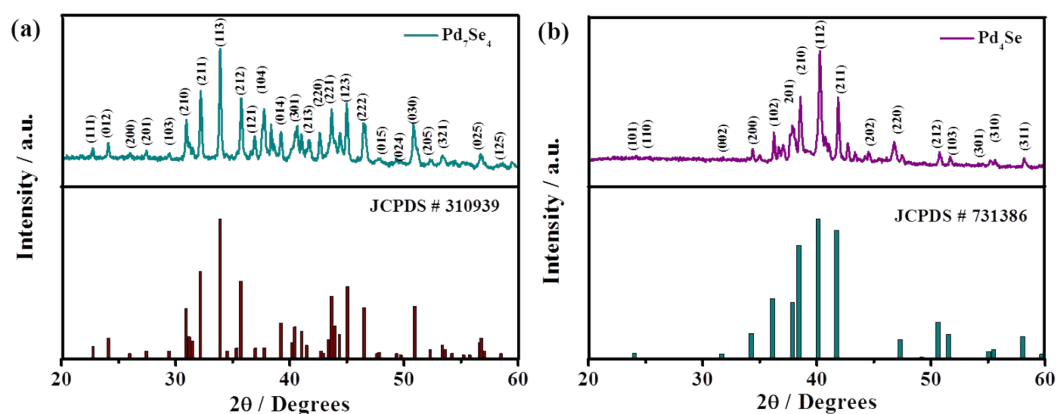

**Fig S2.** XRD patterns of Pd<sub>7</sub>Se<sub>4</sub> (a) and Pd<sub>4</sub>Se (b) nanostructures prepared on AAO template.

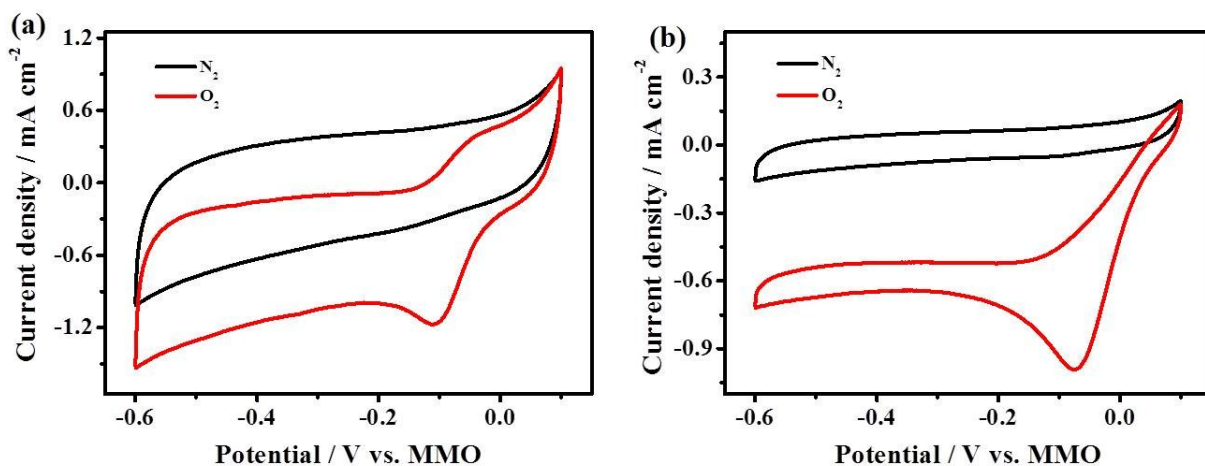

**Figure S3.** Cyclic voltammograms of (a) Pd<sub>7</sub>Se<sub>4</sub> and (b) Pd<sub>4</sub>Se in the presence of N<sub>2</sub> and O<sub>2</sub> in 0.1 M KOH solution at a scan rate of 50 mVs<sup>-1</sup>.

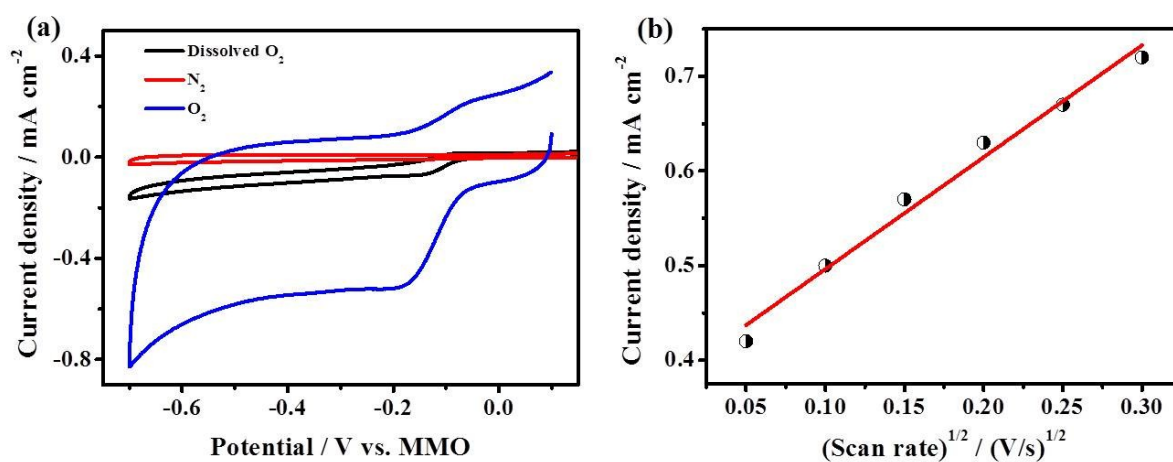

**Figure S4.** (a) Cyclic voltammograms of Pd<sub>17</sub>Se<sub>15</sub> in N<sub>2</sub>-saturated, O<sub>2</sub>-saturated and in the presence of dissolved O<sub>2</sub>, (b) Variation of peak current density as a function of square root of scan rate on Pd<sub>17</sub>Se<sub>15</sub> in O<sub>2</sub>-saturated 0.1 M KOH solution.

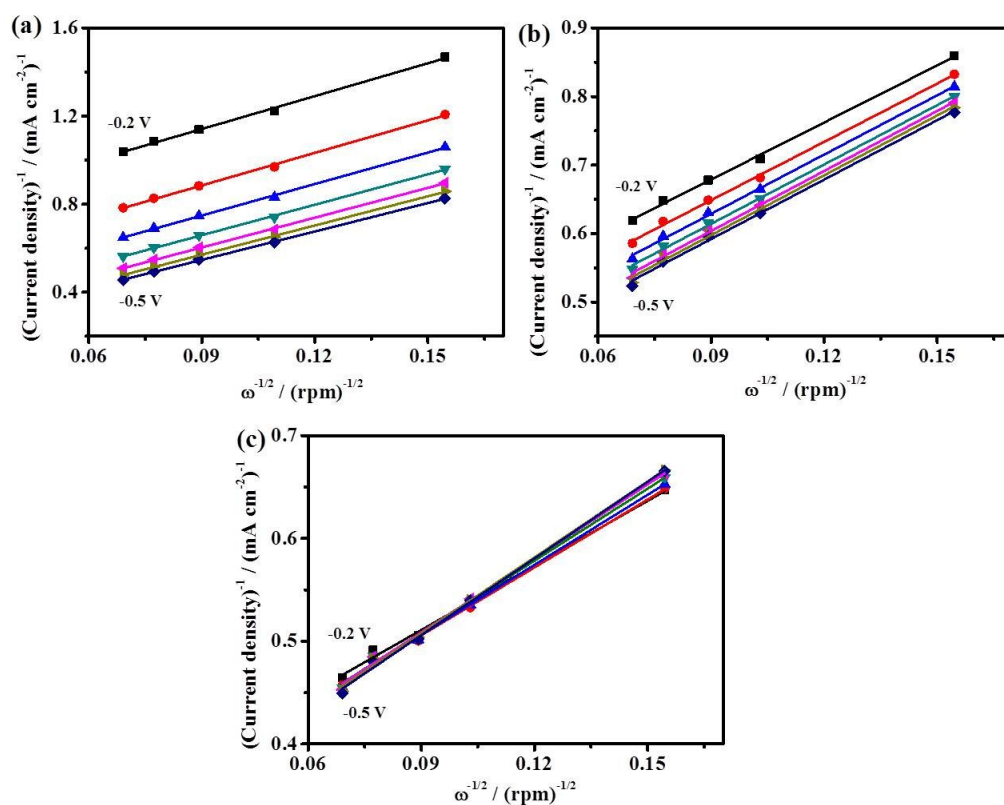

**Figure S5.** K-L plots at different potentials from -0.2 to -0.5 V in the interval of -0.05 V on Pd<sub>17</sub>Se<sub>15</sub>, Pd<sub>7</sub>Se<sub>4</sub> and Pd<sub>4</sub>Se recorded at a scan rate of 2 mVs<sup>-1</sup>.

### Determination of kinetic parameters

The kinetic parameters such as rate constant, kinetic current density and number of electrons transferred during O<sub>2</sub> reduction are extracted from the voltammograms at different potentials and at different rotation speeds using Koutecky-Levich (K-L) equation as given below (**equation 1**).

$$\frac{1}{i} = \frac{1}{i_k} + \frac{1}{B\omega^{1/2}} \quad (1)$$

where  $i$  is the measured current,  $i_k$  is the kinetic current and  $\omega$  is the electrode rotating rate. The value of Levich slope ( $B$ ) is evaluated from the following **equation 2**.

$$B = 0.62nFC_{O_2}D_{O_2}^{2/3}\nu^{-1/6} \quad (2)$$

where  $n$  indicates the transferred electrons number per O<sub>2</sub> molecule,  $F$  is the Faraday constant ( $F = 96485 \text{ C mol}^{-1}$ ),  $C_{O_2}$  is the concentration of O<sub>2</sub> in the electrolyte ( $C_0 = 1.2 \times 10^{-6} \text{ molm}^{-3}$ )

$D_{O_2}$  is the diffusion coefficient of O<sub>2</sub> ( $D_0 = 1.9 \times 10^{-5} \text{ cm}^2 \text{ s}^{-1}$ ), and  $\nu$  is the kinematic viscosity ( $\nu = 0.01 \text{ cm}^2 \text{ s}^{-1}$ ).<sup>40</sup>

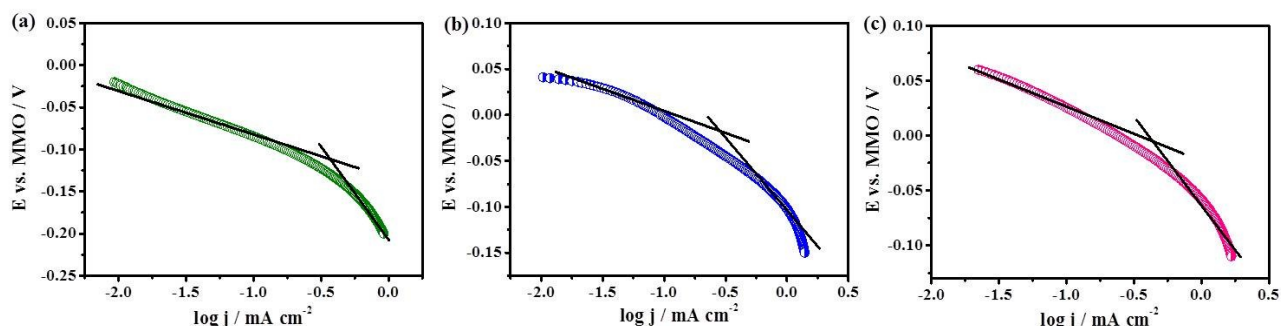

**Figure S6.** Tafel plots for ORR on (a) Pd<sub>17</sub>Se<sub>15</sub>, (b) Pd<sub>7</sub>Se<sub>4</sub> and (c) Pd<sub>4</sub>Se in O<sub>2</sub>-saturated 0.1 M KOH with a scan rate of 2 mVs<sup>-1</sup>.

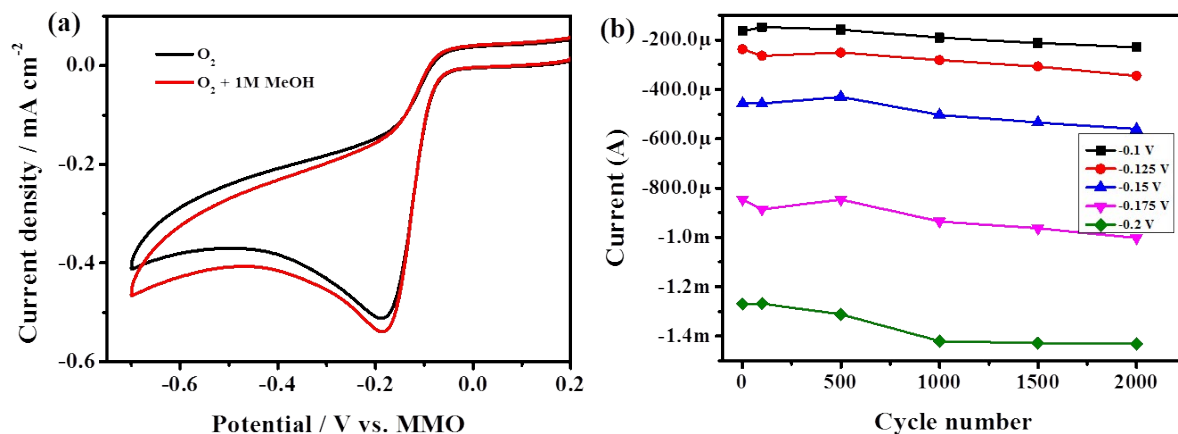

**Figure S7.** (a) Cyclic voltammograms for ORR in absence (black) and in presence (red) of 1 M methanol on Pd<sub>17</sub>Se<sub>15</sub> catalyst. Supporting electrolyte used is 0.1 M KOH with a sweep rate of 50 mVs<sup>-1</sup>, (b) Retention of current vs. cycle number at different applied potentials (Supporting electrolyte is O<sub>2</sub> saturated 0.1 M KOH and scan rate of 100 mVs<sup>-1</sup>).

### Different environments present around Pd

#### Pd<sub>17</sub>Se<sub>15</sub>

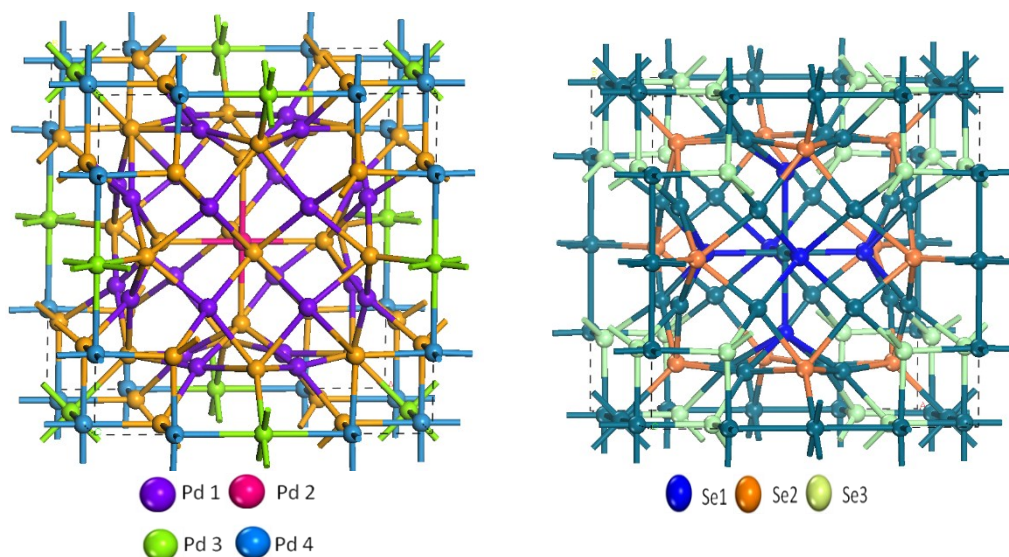

#### Pd<sub>7</sub>Se<sub>4</sub>

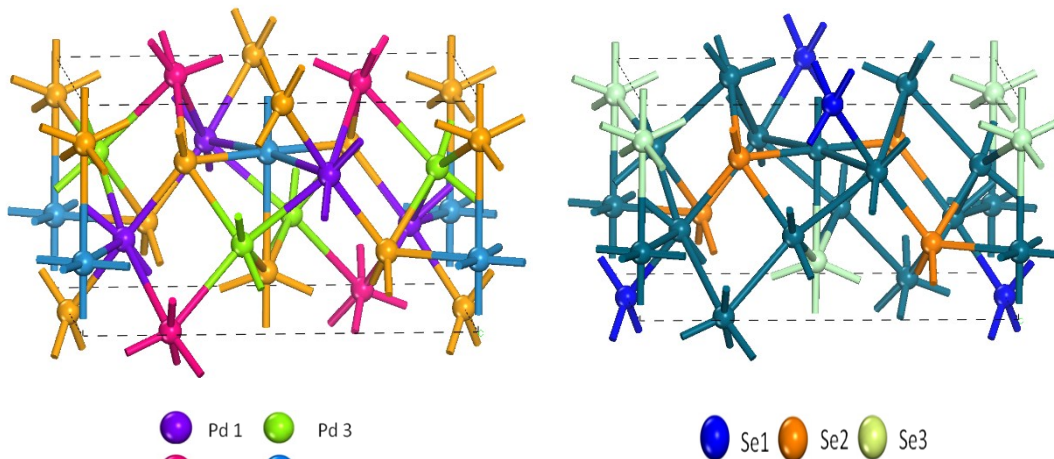

#### Pd<sub>4</sub>Se

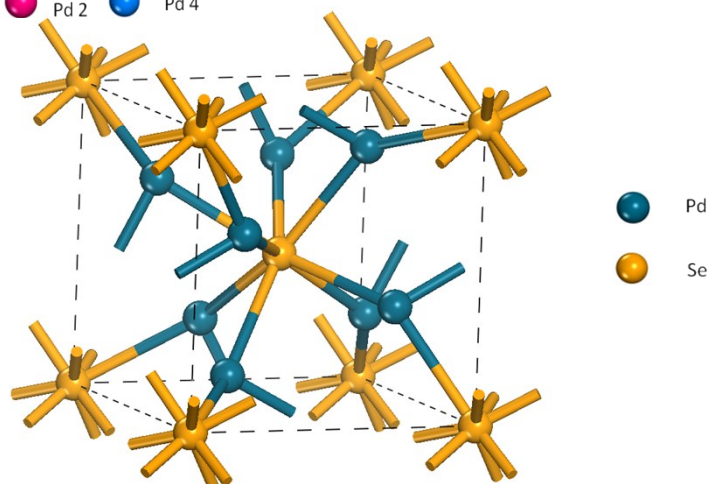

**Figure S8.** Different environment present around palladium in the three different phases, Pd<sub>17</sub>Se<sub>15</sub>, Pd<sub>7</sub>Se<sub>4</sub> and Pd<sub>4</sub>Se.

**Table S1.** Variation of rate constant values at different potentials on Pd<sub>17</sub>Se<sub>15</sub> bulk and nanostructures.

| Potential (V) | Pd <sub>17</sub> Se <sub>15</sub> (bulk) / cm sec <sup>-1</sup> | Pd <sub>17</sub> Se <sub>15</sub> (nanorods) / cm sec <sup>-1</sup> |
|---------------|-----------------------------------------------------------------|---------------------------------------------------------------------|
| -0.2          | 8.4 × 10 <sup>-3</sup>                                          | 2.3 × 10 <sup>-2</sup>                                              |
| -0.3          | 1.1 × 10 <sup>-2</sup>                                          | 2.8 × 10 <sup>-2</sup>                                              |
| -0.4          | 1.3 × 10 <sup>-2</sup>                                          | 3.1 × 10 <sup>-2</sup>                                              |
| -0.5          | 1.5 × 10 <sup>-2</sup>                                          | 3.5 × 10 <sup>-2</sup>                                              |

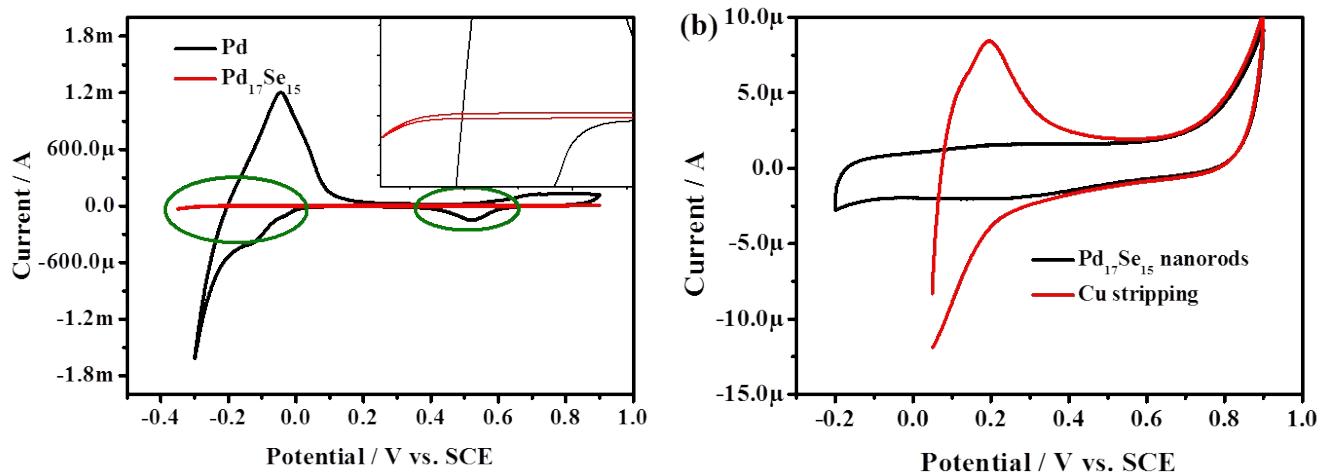

**Figure S9.** Cyclic voltammograms of Pd and Pd<sub>17</sub>Se<sub>15</sub> on a glassy-carbon disk electrode in N<sub>2</sub>-saturated 0.5 M H<sub>2</sub>SO<sub>4</sub> with scan rate of 50 mVs<sup>-1</sup>. [circled region indicates the absence of oxidation of palladium in Pd<sub>17</sub>Se<sub>15</sub> which is also shown in the inset]. Cu under potential deposition (UPD) stripping voltammograms on (b) Pd<sub>17</sub>Se<sub>15</sub> nanorods in 0.5 M H<sub>2</sub>SO<sub>4</sub> + 2 mM CuSO<sub>4</sub> saturated with nitrogen at a sweep rate of 10 mV/s. Respective background voltammograms at the same scan rate without CuSO<sub>4</sub> are also shown.

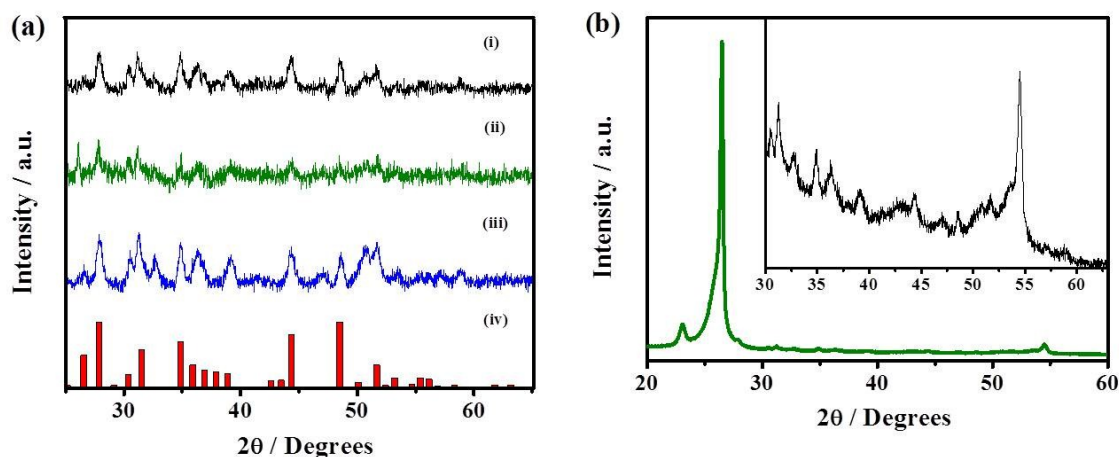

**Figure S10.** (a) XRD patterns of Pd<sub>17</sub>Se<sub>15</sub> powder (i), acetylene black-Pd<sub>17</sub>Se<sub>15</sub> (ii), rGO-Pd<sub>17</sub>Se<sub>15</sub> (iii) and the standard pattern of Pd<sub>17</sub>Se<sub>15</sub> (iv) and (b) XRD pattern of Pd<sub>17</sub>Se<sub>15</sub> on toray carbon. [Inset shows the enlarged region from 30 to 60°]

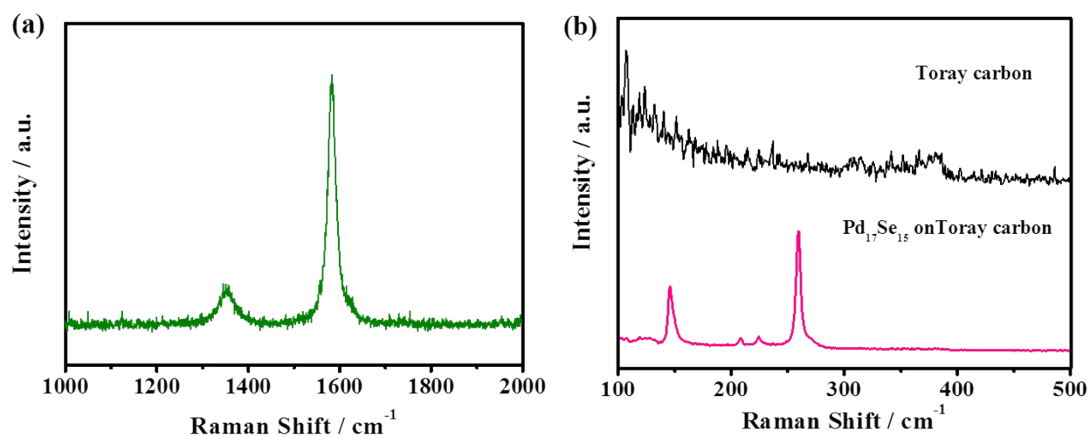

**Figure S11.** Raman spectra of (a) Toray carbon and (b) only toray carbon and Pd<sub>17</sub>Se<sub>15</sub> supported on toray carbon.

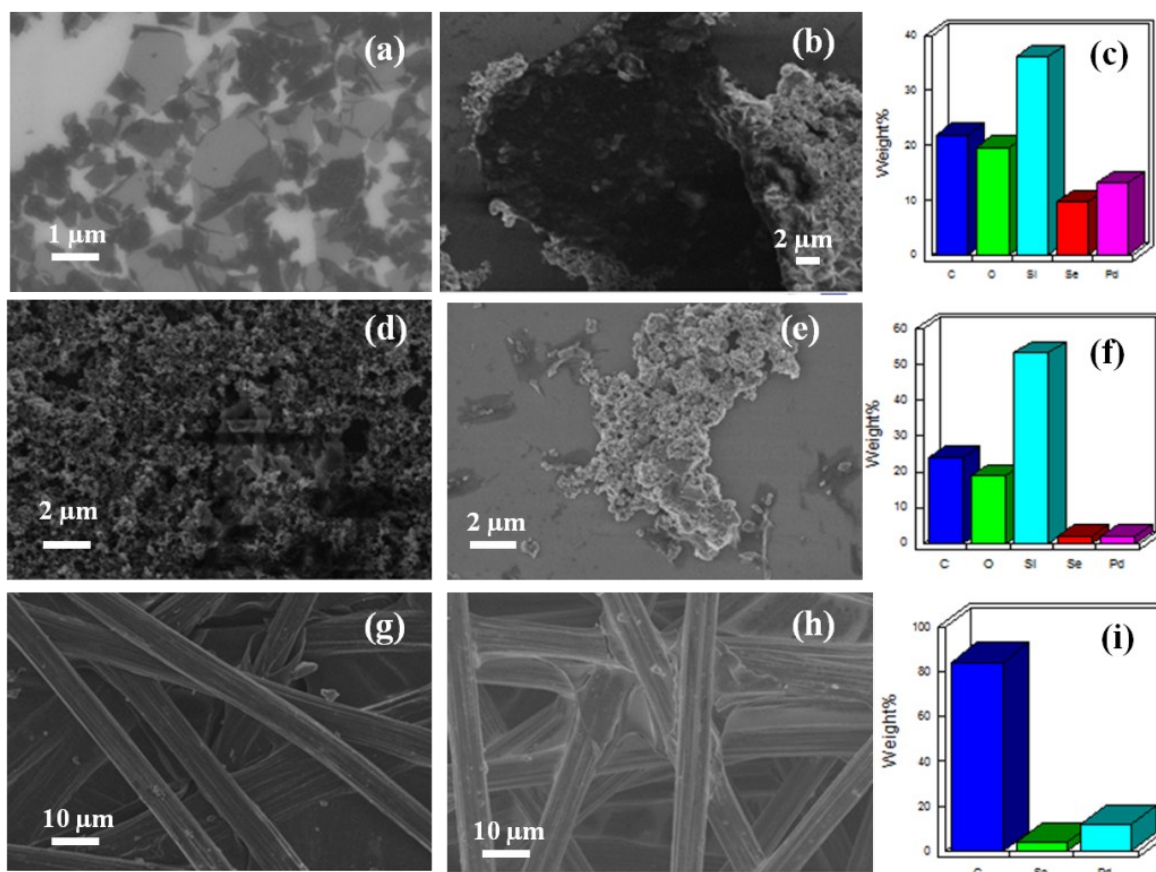

**Figure S12.** SEM images of (a) GO, (b) GO-Pd<sub>17</sub>Se<sub>15</sub>, (d) acetylene black, (e) acetylene black-Pd<sub>17</sub>Se<sub>15</sub>, (g) toray carbon, (h) toray carbon-Pd<sub>17</sub>Se<sub>15</sub> and (c), (f) & (i) are the corresponding EDAX images of the composites.

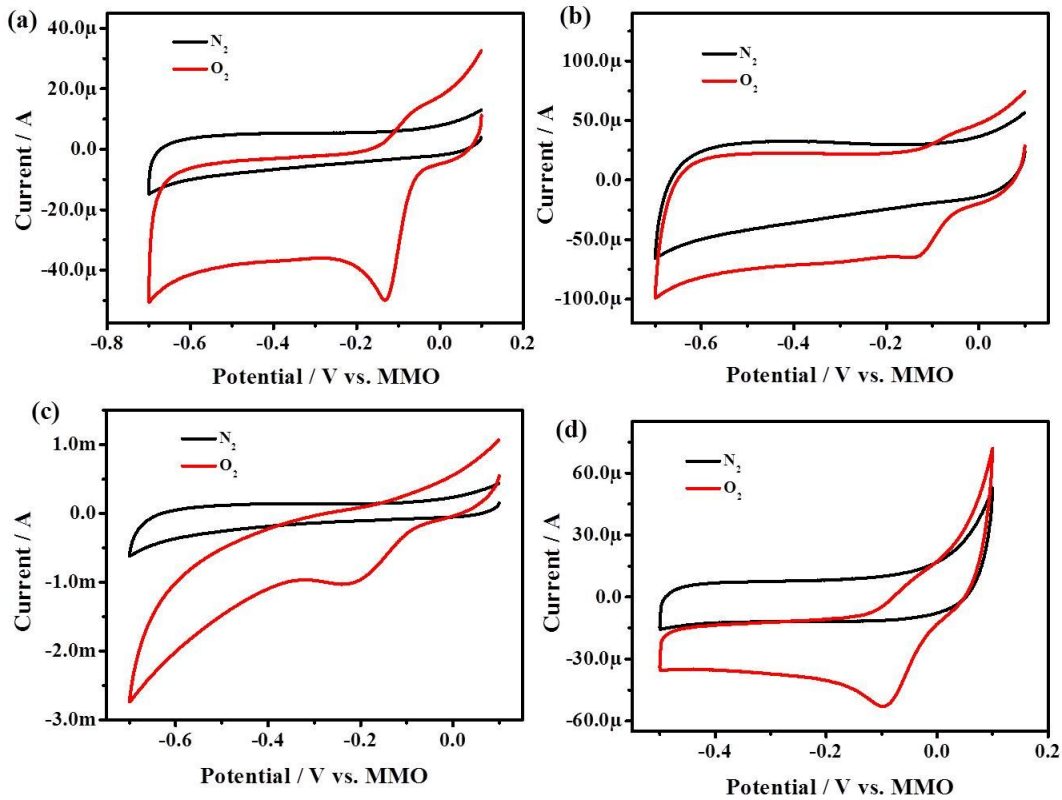

**Figure S13.** Cyclic voltammograms of (a) Pd<sub>17</sub>Se<sub>15</sub>-acetylene black, (b) Pd<sub>17</sub>Se<sub>15</sub>-reduced graphene oxide, (c) Pd<sub>17</sub>Se<sub>15</sub>-toray carbon and (d) Pd<sub>17</sub>Se<sub>15</sub> nanostructures in N<sub>2</sub> and O<sub>2</sub>-saturated 0.1 M KOH solution.

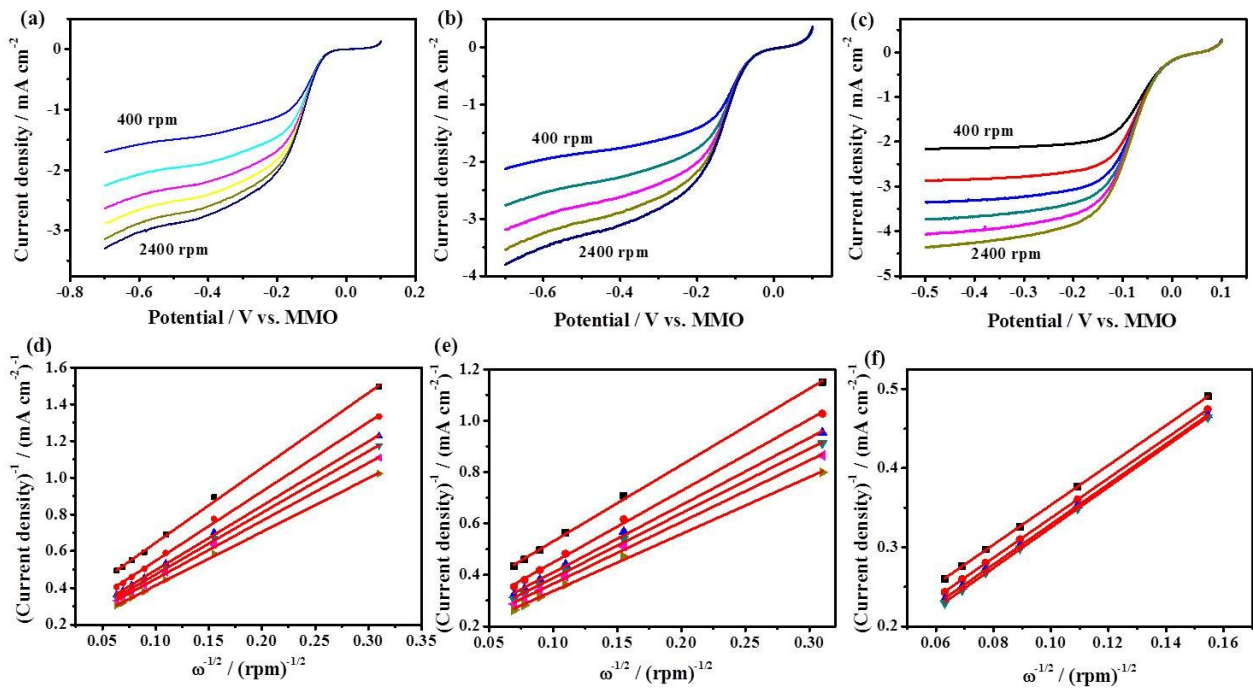

**Figure S14.** Linear sweep voltammograms of (a) Pd<sub>17</sub>Se<sub>15</sub>-acetylene black, (b) Pd<sub>17</sub>Se<sub>15</sub>-reduced graphene oxide, (c) Pd<sub>17</sub>Se<sub>15</sub> nanostructures in O<sub>2</sub>-saturated 0.1 M KOH at scan rate of 2 mVs<sup>-1</sup> at different rotation rates from 400 to 2400 rpm in the interval of 400 and (d), (e) & (f) corresponding K-L plots at different potentials vs. MMO.

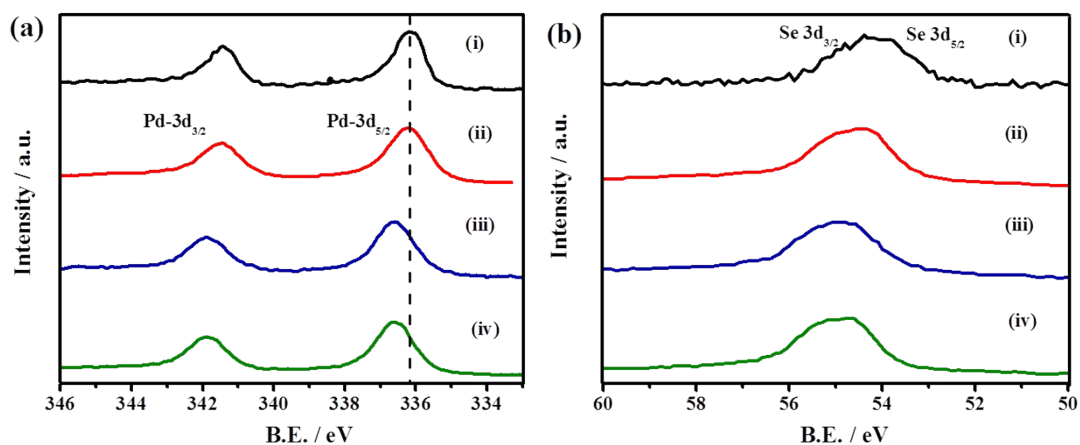

**Figure S15.** XPS spectra of (a) Pd-3d and (b) Se-3d for (i) Pd<sub>17</sub>Se<sub>15</sub>, (ii) acetylene black-Pd<sub>17</sub>Se<sub>15</sub>, (iii) rGO-Pd<sub>17</sub>Se<sub>15</sub> and (iv) toray carbon-Pd<sub>17</sub>Se<sub>15</sub>.

**Table S2:** Binding energy values of Pd-3d and Se-3d levels in different carbon composite materials.

| Material                              | Pd-3d <sub>5/2</sub> (eV) | Pd-3d <sub>3/2</sub> (eV) | Se-3d <sub>5/2</sub> (eV) | Se-3d <sub>3/2</sub> (eV) |
|---------------------------------------|---------------------------|---------------------------|---------------------------|---------------------------|
| Pd <sub>17</sub> Se <sub>15</sub>     | 336.1                     | 341.3                     | 53.8                      | 54.7                      |
| rGO-Pd <sub>17</sub> Se <sub>15</sub> | 336.2                     | 341.4                     | 54.2                      | 54.9                      |
| AB-Pd <sub>17</sub> Se <sub>15</sub>  | 336.5                     | 341.8                     | 54.5                      | 55.4                      |
| TC-Pd <sub>17</sub> Se <sub>15</sub>  | 336.6                     | 341.9                     | 54.6                      | 55.5                      |

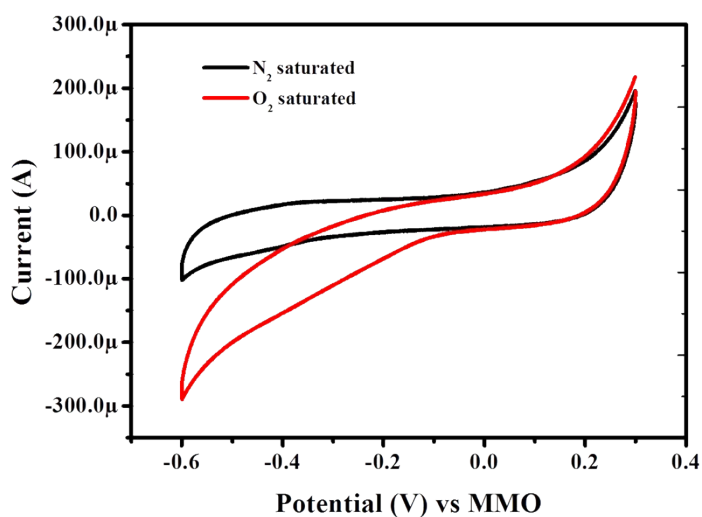

**Figure S16.** Cyclic voltammograms recorded in 2.6 M Mg(NO<sub>3</sub>)<sub>2</sub> + 3.6 M NaNO<sub>2</sub> at a scan rate of 100 mVs<sup>-1</sup> in O<sub>2</sub> and N<sub>2</sub> saturated conditions.



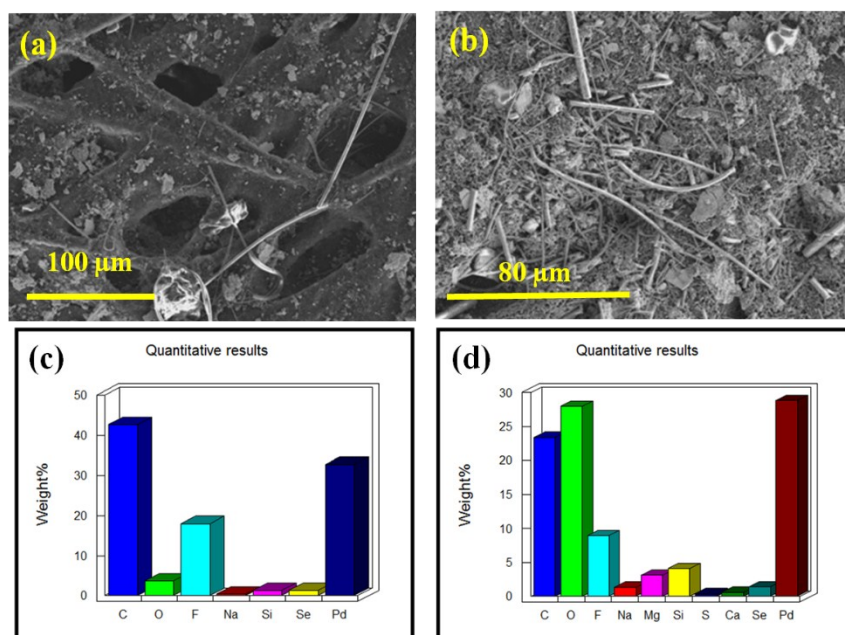

**Figure S17.** SEM images of Pd<sub>4</sub>Se (a) before [(c) presence of Pd and Se] and (b) after discharge [(d) presence of Pd and Se along with increased oxygen content] of Mg-air battery.

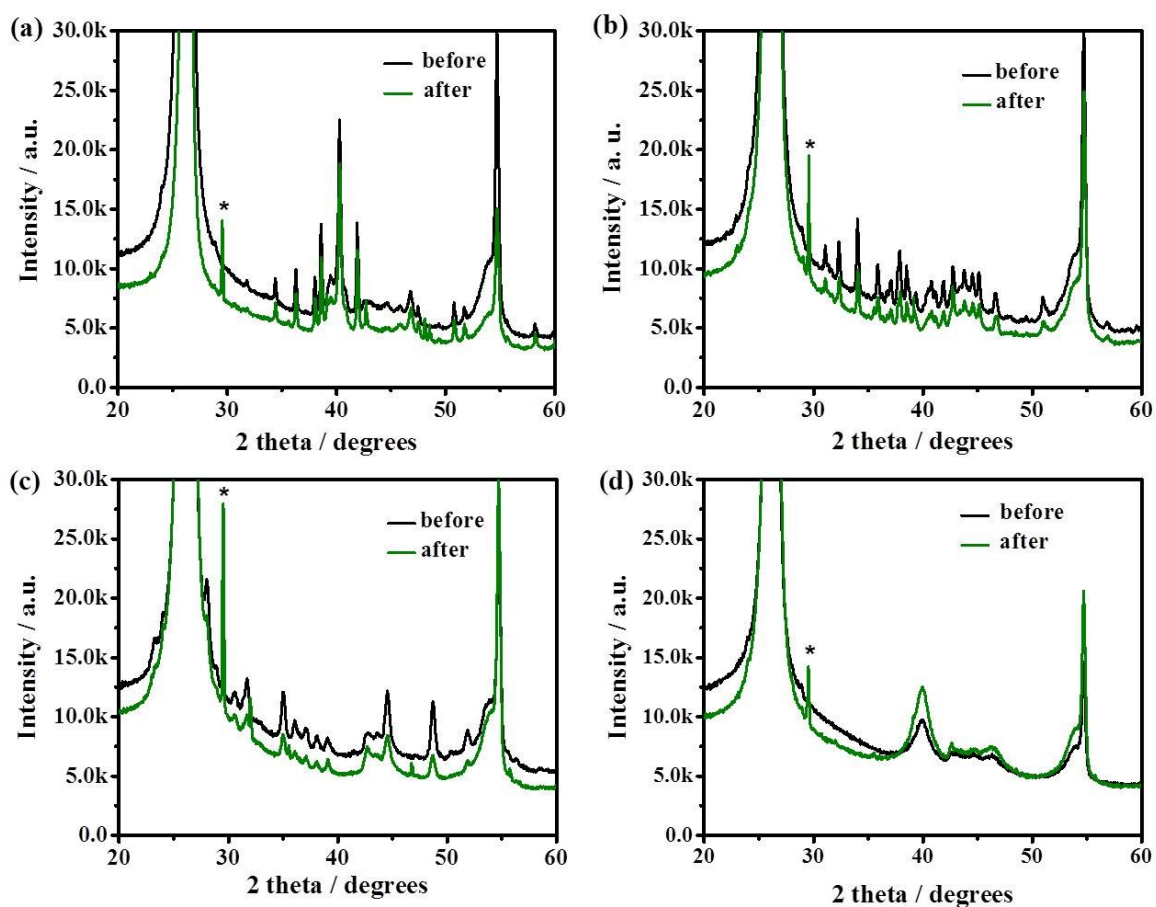

**Figure S18.** XRD patterns of (a) Pd<sub>4</sub>Se (b) Pd<sub>7</sub>Se<sub>4</sub>, (c) Pd<sub>17</sub>Se<sub>15</sub> and (d) Pt, before and after discharge of Mg-air primary batteries.

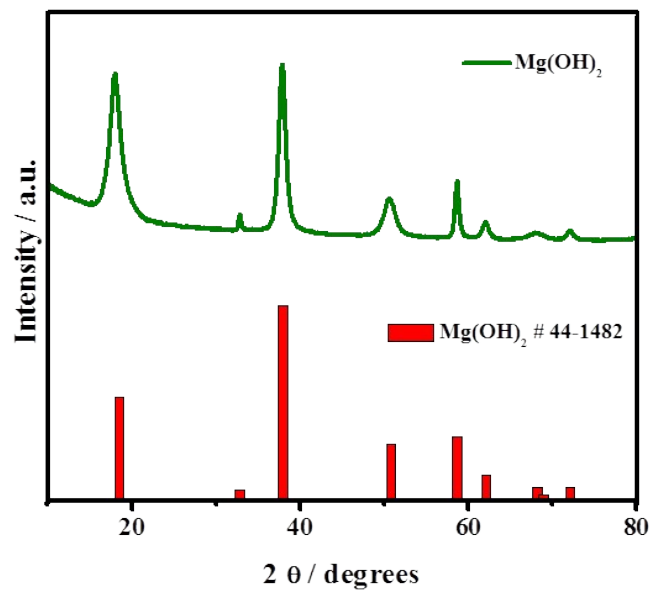

**Figure S19.** XRD pattern and the corresponding standard pattern of  $\text{Mg}(\text{OH})_2$  formed on the Mg foil after battery discharge.

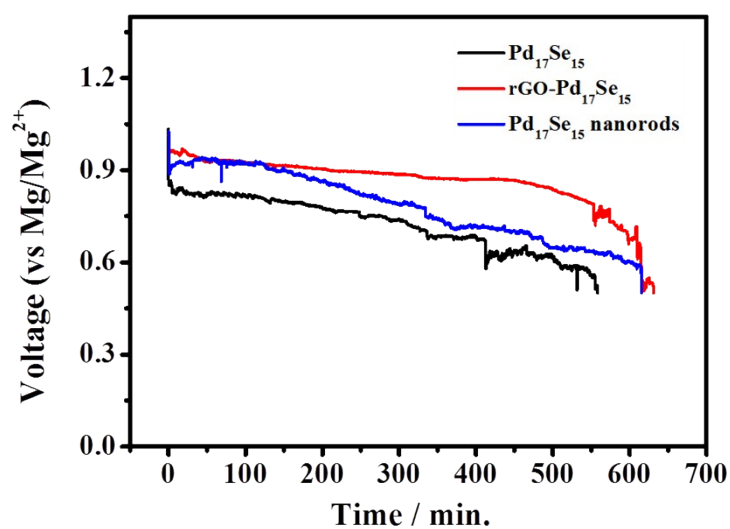

**Figure S20.** Discharge curves of Mg- $\text{O}_2$  battery with bulk  $\text{Pd}_{17}\text{Se}_{15}$ ,  $\text{Pd}_{17}\text{Se}_{15}$  supported on rGO and  $\text{Pd}_{17}\text{Se}_{15}$  nanorods as cathodes. Constant current density of  $1 \text{ mA cm}^{-2}$  is used for discharge.

**Table S3:** Comparison of discharge capacity values of palladium selenides with other reported catalysts in literature.

| Anode                     | Cathode                    | Electrolyte                                                          | Operating Voltage (V) | Discharge capacity (mAh g <sup>-1</sup> ) | References                                        |
|---------------------------|----------------------------|----------------------------------------------------------------------|-----------------------|-------------------------------------------|---------------------------------------------------|
| AMX602 and AM60 alloys    | Activated carbon sheet     | 5 mass% NaCl                                                         | ~ 0.65                | 1331                                      | <i>J. Power Sources</i> , <b>2015</b> , 297, 449  |
| <b>Mg foil</b>            | <b>Ag</b>                  | <b>Organic/Aqueous</b>                                               | <b>~ 0.8</b>          | <b>2020</b>                               | <i>J. Power Sources</i> , <b>2014</b> , 247, 840  |
| Mg-Li-Al-Ce alloy         | Silver                     | 3.5 wt % NaCl                                                        | ~ 1.27                | 2072                                      | <i>J. Power Sources</i> , <b>2011</b> , 196, 2346 |
| Mg piece                  | Pt/C, Pt-Mo/C              | 3.5 wt % NaCl                                                        | ~ 1.3                 | 1311                                      | <i>RSC Adv.</i> , <b>2016</b> , 6, 83025          |
| Mg nano/micro spheres     | $\gamma$ -MnO <sub>2</sub> | 2.6 M Mg(NO <sub>3</sub> ) <sub>2</sub> + 3.6 M NaNO <sub>2</sub>    | ~ 1.5                 | 768                                       | <i>Nano Research</i> , <b>2009</b> , 2, 713       |
| <b>Mg micro particles</b> | <b>Pd<sub>4</sub>Se</b>    | <b>2.6 M Mg(NO<sub>3</sub>)<sub>2</sub> + 3.6 M NaNO<sub>2</sub></b> | <b>~ 0.9</b>          | <b>2228</b>                               | <b>Present work</b>                               |
